# Supplementary material for: NiO-MgO Prepared by the Complex-Decomposition Method as a Catalyst for Carbon Dioxide Reforming of Methane
Source: MDPI journal article supplement (doi:10.3390/pr11020596), 2023-02-16
Supplement: s1 [file s1]

## **Supporting information**

### **NiO-MgO prepared by the complex-decomposition method as a catalyst for carbon dioxide reforming of methane**

Ying Wang, Bin Li, Yong-Shan Xiao, Zhong-Wen Liu\*

*Key Laboratory of Syngas Conversion of Shaanxi Province, School of Chemistry and Chemical  
Engineering, Shaanxi Normal University, Xi'an 710119, China*

\* Correspondence: [zwliu@snnu.edu.cn](mailto:zwliu@snnu.edu.cn)

No. 620, West Chang'an Avenue

School of Chemistry & Chemical Engineering

Shaanxi Normal University

Xi'an 710119, China

Tel: +86-29-8153-0801

Fax: +86-29-8153-0727

E-mail: [zwliu@snnu.edu.cn](mailto:zwliu@snnu.edu.cn)

## List of contents

|                                                                                                                                                             |    |
|-------------------------------------------------------------------------------------------------------------------------------------------------------------|----|
| <b>Figure S1.</b> N <sub>2</sub> adsorption-desorption isotherms of the fresh Ni <sub>0.1</sub> Mg <sub>0.9</sub> O-800-Y catalysts.....                    | 3  |
| <b>Figure S2.</b> TEM images of the reduced Ni <sub>0.1</sub> Mg <sub>0.9</sub> O-800-Y catalysts.....                                                      | 4  |
| <b>Figure S3.</b> XRD patterns of the fresh and reduced Ni <sub>0.1</sub> Mg <sub>0.9</sub> O-Gly-T catalysts.....                                          | 5  |
| <b>Figure S4.</b> CH <sub>4</sub> conversions of Ni <sub>0.1</sub> Mg <sub>0.9</sub> O-T-Gly and Ni <sub>x</sub> Mg <sub>1-x</sub> O-800-Gly catalysts..... | 6  |
| <b>Figure S5.</b> XRD patterns of the fresh and reduced Ni <sub>x</sub> Mg <sub>1-x</sub> O-800-Gly catalysts.....                                          | 7  |
| <b>Figure S6.</b> TG curves and XRD patterns of the spent Ni <sub>0.1</sub> Mg <sub>0.9</sub> O-T-Gly catalysts.....                                        | 8  |
| <b>Figure S7.</b> TG curves and XRD patterns of the spent Ni <sub>x</sub> Mg <sub>1-x</sub> O-800-Gly catalysts.....                                        | 9  |
| <b>Table S1</b> Summarized reaction conditions and the typical CRM results of the optimal NiO-MgO and the representatively reported Ni-based catalysts..... | 10 |

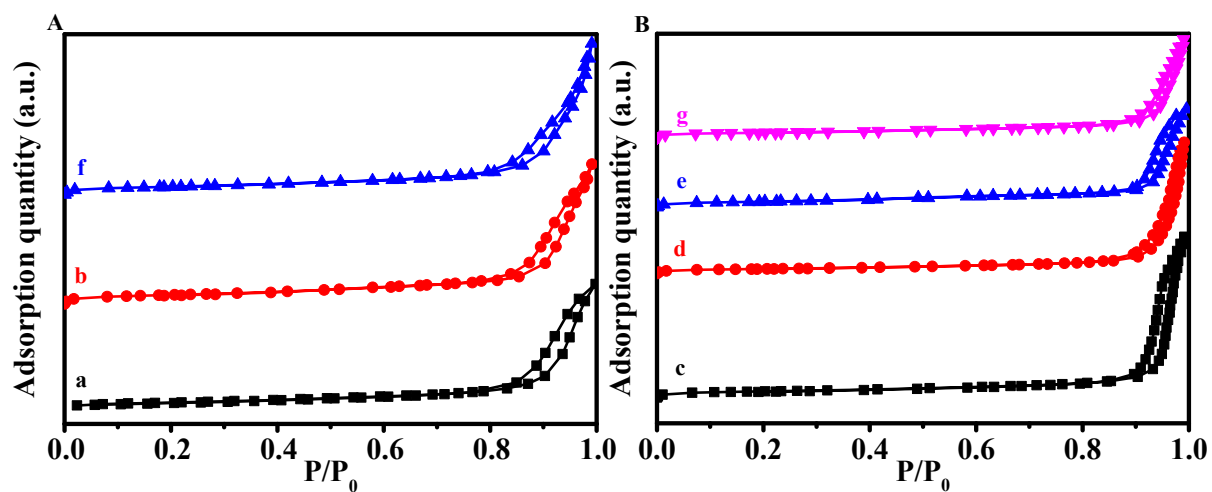

**Figure S1.**  $N_2$  adsorption-desorption isotherms of the fresh catalysts of  $Ni_{0.1}Mg_{0.9}O$ -800-Gly (a),  $Ni_{0.1}Mg_{0.9}O$ -800-Gla (b),  $Ni_{0.1}Mg_{0.9}O$ -800-Oxa (c),  $Ni_{0.1}Mg_{0.9}O$ -800-Pro (d),  $Ni_{0.1}Mg_{0.9}O$ -800-Ser (e),  $Ni_{0.1}Mg_{0.9}O$ -800-Urea (f), and  $Ni_{0.1}Mg_{0.9}O$ -800-Ala (g).

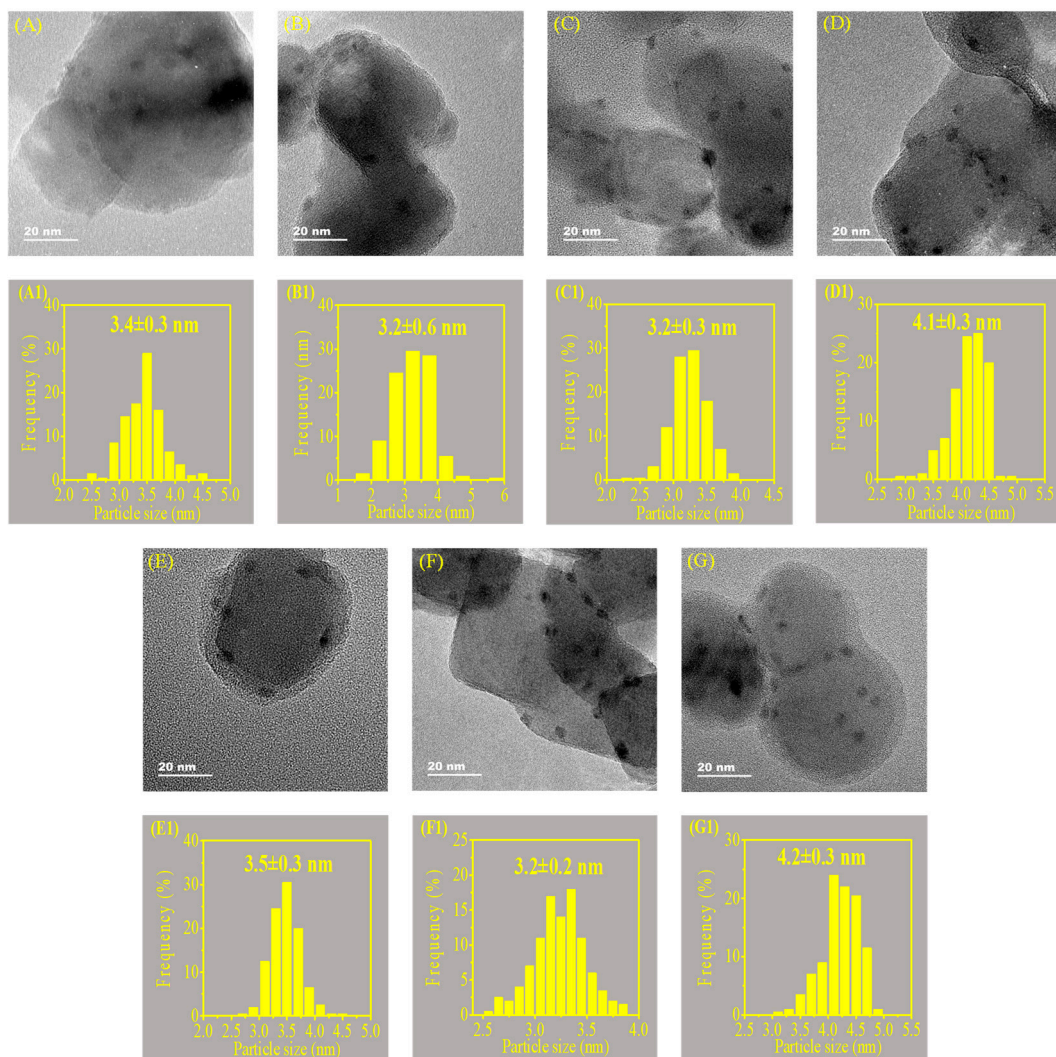

**Figure S2.** TEM images and the corresponding particle-size distributions for the reduced catalysts of  $\text{Ni}_{0.1}\text{Mg}_{0.9}\text{O-800-Gly}$  (A, A1),  $\text{Ni}_{0.1}\text{Mg}_{0.9}\text{O-800-Gla}$  (B, B1),  $\text{Ni}_{0.1}\text{Mg}_{0.9}\text{O-800-Oxa}$  (C, C1),  $\text{Ni}_{0.1}\text{Mg}_{0.9}\text{O-800-Pro}$  (D, D1),  $\text{Ni}_{0.1}\text{Mg}_{0.9}\text{O-800-Ser}$  (E, E1),  $\text{Ni}_{0.1}\text{Mg}_{0.9}\text{O-800-Urea}$  (F, F1),  $\text{Ni}_{0.1}\text{Mg}_{0.9}\text{O-800-Ala}$  (G, G1).

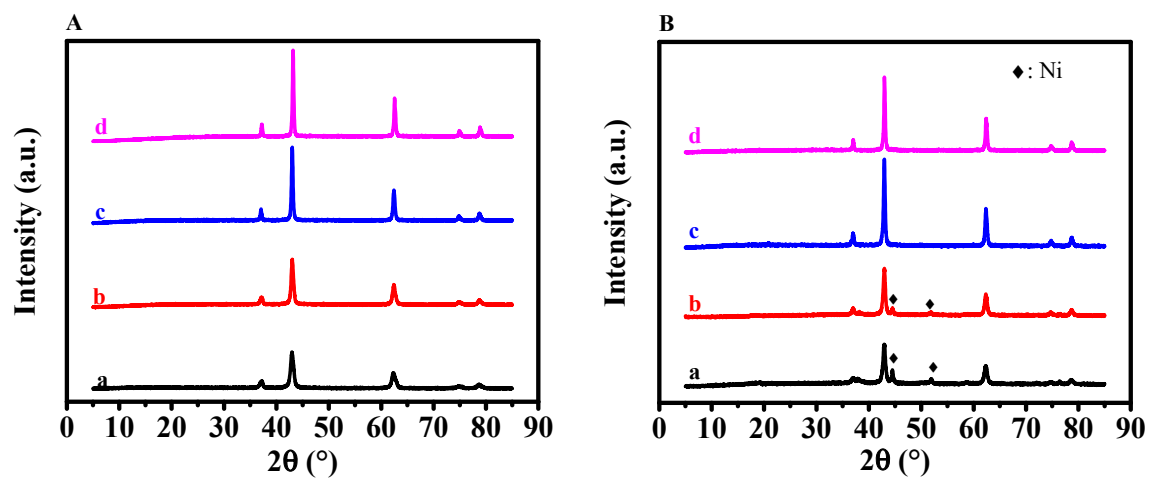

**Figure S3.** XRD patterns for the fresh (A) and reduced (B) catalysts of  $\text{Ni}_{0.1}\text{Mg}_{0.9}\text{O-Gly-600}$  (a),  $\text{Ni}_{0.1}\text{Mg}_{0.9}\text{O-Gly-700}$  (b),  $\text{Ni}_{0.1}\text{Mg}_{0.9}\text{O-Gly-800}$  (c),  $\text{Ni}_{0.1}\text{Mg}_{0.9}\text{O-Gly-900}$  (d).

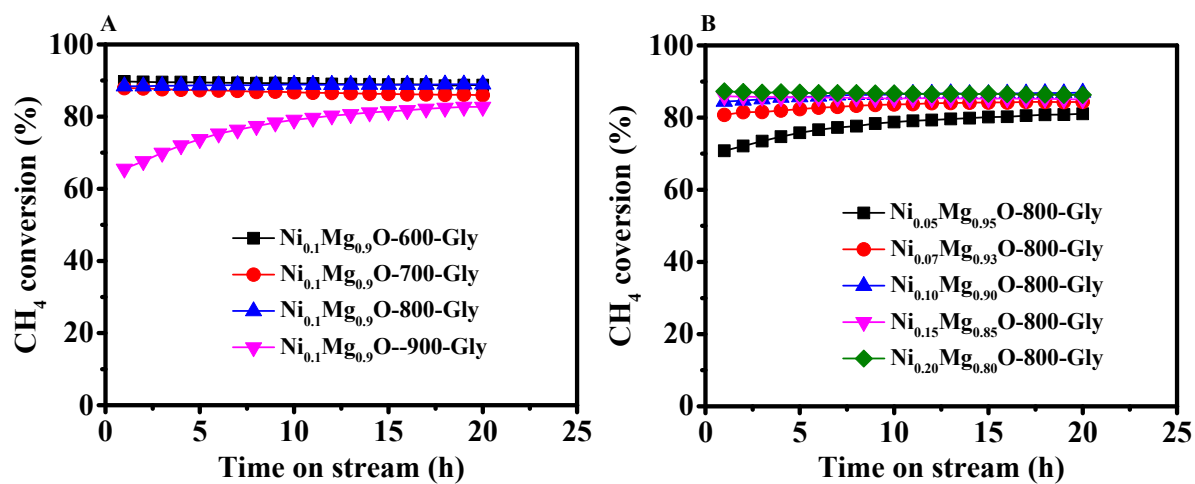

**Figure S4.** The time-on-stream conversions of CH<sub>4</sub> for Ni<sub>0.1</sub>Mg<sub>0.9</sub>O-T-Gly (A) and Ni<sub>x</sub>Mg<sub>1-x</sub>O-800-Gly (B) catalyzed CRM under the conditions of CH<sub>4</sub>/CO<sub>2</sub> = 1, 750 °C, 0.1 MPa and GHSV of 60000 mL·g<sup>-1</sup>·h<sup>-1</sup>

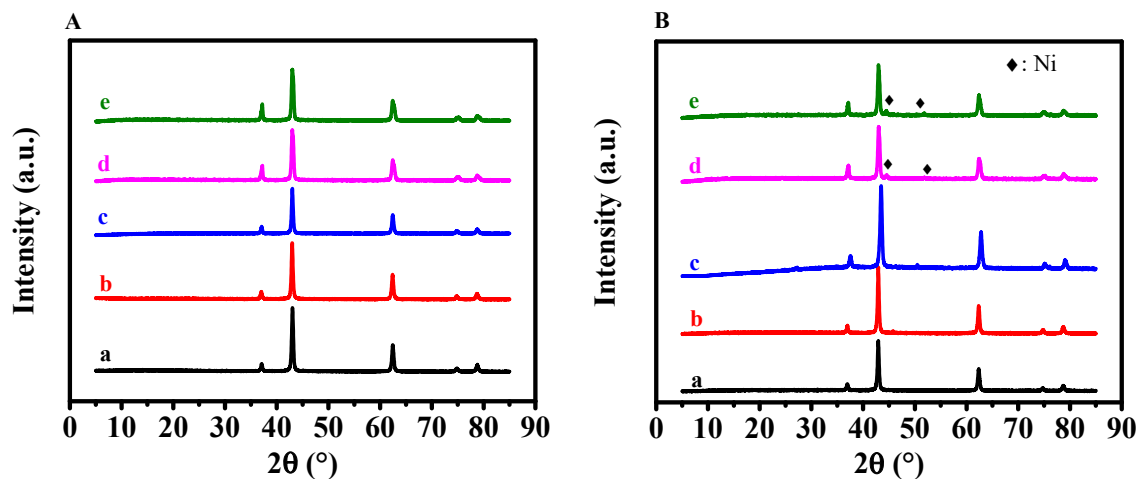

**Figure S5.** XRD patterns of fresh (A) and reduced (B) catalysts of  $\text{Ni}_{0.05}\text{Mg}_{0.95}\text{O-800-Gly}$  (a),  $\text{Ni}_{0.07}\text{Mg}_{0.93}\text{O-800-Gly}$  (b),  $\text{Ni}_{0.10}\text{Mg}_{0.90}\text{O-800-Gly}$  (c),  $\text{Ni}_{0.15}\text{Mg}_{0.85}\text{O-800-Gly}$  (d),  $\text{Ni}_{0.20}\text{Mg}_{0.80}\text{O-800-Gly}$  (e).

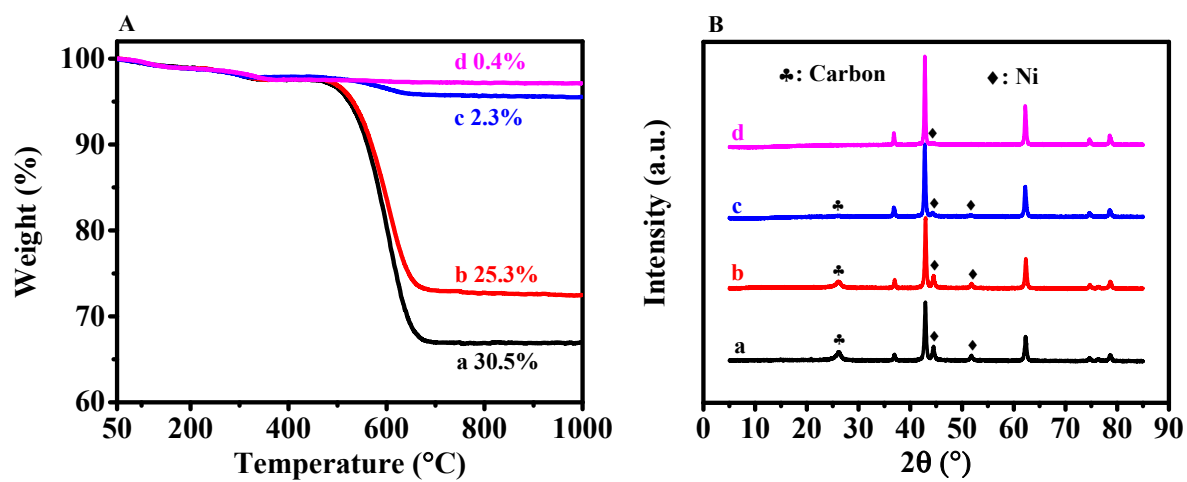

**Figure S6.** TG curves (A) and XRD patterns (B) for the spent catalysts of  $\text{Ni}_{0.1}\text{Mg}_{0.9}\text{O-Gly-600}$  (a),  $\text{Ni}_{0.1}\text{Mg}_{0.9}\text{O-Gly-700}$  (b),  $\text{Ni}_{0.1}\text{Mg}_{0.9}\text{O-Gly-800}$  (c),  $\text{Ni}_{0.1}\text{Mg}_{0.9}\text{O-Gly-900}$  (d).



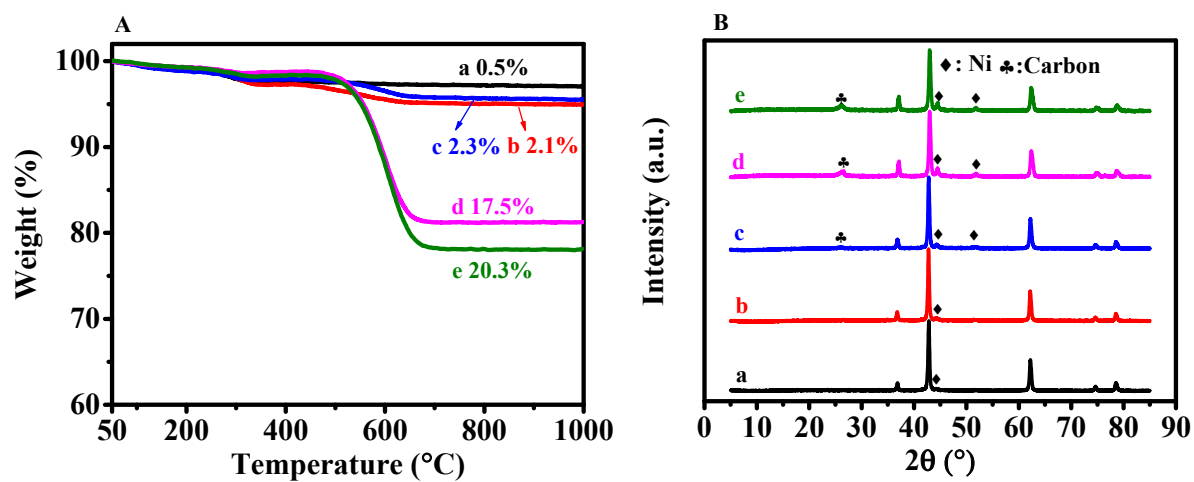

**Figure S7.** TG curves (A) and XRD patterns (B) for the spent catalysts of  $\text{Ni}_{0.05}\text{Mg}_{0.95}\text{O-800-Gly}$  (a),  $\text{Ni}_{0.07}\text{Mg}_{0.93}\text{O-800-Gly}$  (b),  $\text{Ni}_{0.10}\text{Mg}_{0.90}\text{O-800-Gly}$  (c),  $\text{Ni}_{0.15}\text{Mg}_{0.85}\text{O-800-Gly}$  (d),  $\text{Ni}_{0.20}\text{Mg}_{0.80}\text{O-800-Gly}$  (e).

**Table S1** Summarized reaction conditions and the typical CRM results of the optimal NiO-MgO and the representatively reported Ni-based catalysts.

| Catalysts                                                                         | Temperature (°C) | Feed molar ratio                                          | GHSV ( $\times 10^4$ mL $\cdot$ h $^{-1}$ $\cdot$ g $^{-1}$ ) | Activity (mol $\cdot$ g $^{-1}$ $\cdot$ h $^{-1}$ )* | Stability (%/h)* | References |
|-----------------------------------------------------------------------------------|------------------|-----------------------------------------------------------|---------------------------------------------------------------|------------------------------------------------------|------------------|------------|
| Ni <sub>0.1</sub> Mg <sub>0.9</sub> O-800-Gly                                     | 750              | CH <sub>4</sub> /CO <sub>2</sub> = 1/1                    | 6.0                                                           | 11.5                                                 | 0                | This work  |
| Ni/MOR zeolite                                                                    | 650              | CH <sub>4</sub> /CO <sub>2</sub> = 1/1                    | 7.2                                                           | 7.4                                                  | 0.58             | S1         |
| Ni/SBA-15                                                                         | 750              | CH <sub>4</sub> /CO <sub>2</sub> /N <sub>2</sub> = 1/1/2  | 1.2                                                           | 11.4                                                 | 0                | S2         |
| Ni/Al <sub>2</sub> O <sub>3</sub> -Ole                                            | 800              | CH <sub>4</sub> /CO <sub>2</sub> /N <sub>2</sub> = 1/1/1  | 2.4                                                           | ~ 3.2                                                | 0                | S3         |
| Pt-12Ni/hydrotalcite                                                              | 700              | CH <sub>4</sub> /CO <sub>2</sub> /Ar = 2/2/1              | 18                                                            | ~ 42.2                                               | 0.13             | S4         |
| Ni/La <sub>2</sub> O <sub>2</sub> CO <sub>3</sub> -Al <sub>2</sub> O <sub>3</sub> | 650              | CH <sub>4</sub> /CO <sub>2</sub> /N <sub>2</sub> = 3/3/14 | 24                                                            | ~ 20.9                                               | 0                | S5         |
| Ni/Al <sub>2</sub> O <sub>3</sub>                                                 | 700              | CH <sub>4</sub> /CO <sub>2</sub> = 1/1                    | 3.0                                                           | 8.1                                                  | 0                | S6         |

\*: The specific activity is defined as CH<sub>4</sub> converted per gram of Ni over the loaded catalyst per hour, and the stability is estimated by the average rate for the decrease of CH<sub>4</sub> conversion with increasing the time on stream.

## References

- S1** Bacariza, C.; Karam, L.; Hassan, N.E.; Lopes, J.M.; Henriques, C. Carbon dioxide reforming of methane over nickel-supported zeolites: a screening study. *Processes*. **2022**, *10*, 1331
- S2** Park, K.S.; Cho, J.M.; Park, Y.M.; Kwon, J.H.; Yu, J.S.; Jeong, H.E.; Choung, J.W.; Bae J.W., Enhanced thermal stability of Ni nanoparticles in ordered mesoporous supports for dry reforming of methane with CO<sub>2</sub>. *Catal. Today* **2022**, 388-389, 224-230.
- S3** Seo, J.-C.; Kim, H.; Lee, Y.-L.; Nam, S.; Roh, H.-S. Lee, K.; Park, S.B., One-pot synthesis of full-featured mesoporous Ni/Al<sub>2</sub>O<sub>3</sub> catalysts via pyrolysis-assisted evaporation-induced self-assembly method for dry reforming of methane. *ACS Sustainable Chem. Eng.* **2021**, *9*, 894-904.
- S4** Niu, J.; Wang, Y.; Liland, S.E.; Regli, S.K.; Yang, J.; Rout, K.R.; Luo, J.; Ronning, M.; Ran, J.; Chen D. Unraveling enhanced activity, selectivity, and coke resistance of Pt-Ni bimetallic clusters in dry reforming. *ACS Catal.* **2021**, *11*, 2398-2411.
- S5** Li, K.; Pei, C. Li, X.; Chen, S.; Zhang, X.; Liu, R.; Gong, J. Dry reforming of methane over La<sub>2</sub>O<sub>2</sub>CO<sub>3</sub>-modified Ni/Al<sub>2</sub>O<sub>3</sub> catalysts with moderate metal support interaction. *Appl. Catal. B-Environ.* **2020**, *264*, 118448.
- S6** Ma, Q.; Han, Y.; Wei, Q.; Makpal S.; Gao, X.; Zhang, J.; Zhao, T.-S., Stabilizing Ni on bimodal mesoporous-macroporous alumina with enhanced coke tolerance in dry reforming of methane to syngas. *J. CO<sub>2</sub> Util.* **2020**, *35*, 288-297.
